# Supplementary material
Source: PubMed Central journal article supplement (PMC9122518)
Supplement: sj-pdf-1-jcb-10.1177_0271678X211056395.pdf [file sj-pdf-1-jcb-10.1177_0271678X211056395.pdf]

**Supplementary Table 1.** TaqMan probes used to analyse gene expression levels of selected markers in isolated microvascular samples.

| Probe target  | Fluorophore | Catalog #                 | Time point | # litters | n Ctrl | n <i>Pdgfb</i> <sup>IECKO</sup> |
|---------------|-------------|---------------------------|------------|-----------|--------|---------------------------------|
| <i>Pdgfb</i>  | FAM         | Mm00440677_m1             | Young      | 3         | 10     | 10                              |
|               |             |                           | Old        | 3         | 10     | 11                              |
| <i>Pdgfrb</i> | FAM         | Mm00435546_m1             | Young      | 2         | 7      | 7                               |
|               |             |                           | Old        | 3         | 10     | 11                              |
| <i>Anpep</i>  | FAM         | Mm00476227_m1             | Young      | 2         | 7      | 7                               |
|               |             |                           | Old        | 3         | 10     | 11                              |
| <i>Kcnj8</i>  | VIC         | Mm00434620_m1             | Young      | 2         | 7      | 7                               |
|               |             |                           | Old        | 3         | 10     | 11                              |
| <i>Abcc9</i>  | VIC         | Mm00441638_m1             | Young      | 2         | 7      | 7                               |
|               |             |                           | Old        | 3         | 10     | 11                              |
| <i>Acta2</i>  | FAM         | Mm00725412_s1             | Young      | 2         | 7      | 7                               |
|               |             |                           | Old        | 3         | 10     | 11                              |
| <i>Tagln</i>  | FAM         | Mm00441661_g1             | Young      | 2         | 7      | 7                               |
|               |             |                           | Old        | 3         | 10     | 11                              |
| <i>Angpt2</i> | FAM         | Mm00545822_m1             | Young      | 3         | 9      | 10                              |
|               |             |                           | Old        | 1         | 6      | 4                               |
| <i>Fgfbp1</i> | FAM         | Mm00456064_s1             | Young      | 2         | 6      | 7                               |
|               |             |                           | Old        | 1         | 6      | 4                               |
| <i>Bmp6</i>   | FAM         | Mm01332882_m1             | Young      | 1         | 2      | 3                               |
|               |             |                           | Old        | 1         | 6      | 4                               |
| <i>Gapdh</i>  | CY5.5       | qMmuCEP0039581,<br>BioRad |            |           |        |                                 |
