# Supplementary material
Source: PubMed Central journal article supplement (PMC9122518)
Supplement: sj-pdf-4-jcb-10.1177_0271678X211056395.pdf [file sj-pdf-4-jcb-10.1177_0271678X211056395.pdf]

**Supplementary Table 2.** List of primary antibodies used for immunohistochemical stainings.

| <b>Primary antibody target</b> | <b>Dilutions</b> | <b>Supplier</b>              | <b>Catalog number</b> |
|--------------------------------|------------------|------------------------------|-----------------------|
| PECAM1                         | 1:200            | Thermo Fischer Scientific    | 553370                |
| PECAM1                         | 1:200            | R&D Systems                  | AF3628                |
| ANPEP                          | 1:200            | BioRad                       | MCA2183EL             |
| ANPEP                          | 1:100            | R&D Systems                  | AF2335                |
| ERG                            | 1:100            | Abcam                        | ab92513               |
| DES                            | 1:100            | Abcam                        | ab15200               |
| PDGFRB                         | 1:100            | Thermo Scientific            | 14-1402               |
| ACTA2-Cy3                      | 1:200            | Sigma Aldrich                | C6198                 |
| ACTA2-A647                     | 1:200            | Santa Cruz                   | Sc-32251              |
| ANGPT2                         | 1:100            | Prof. Gou Young Koh          | -                     |
| CLDN5                          | 1:100            | Invitrogen                   | 34-1600               |
| VECAD                          | 1:100            | BD Pharmingen                | 555289                |
| COLLIV                         | 1:100            | BioRad                       | 2150-1470             |
| PODXL                          | 1:200            | R&D Systems                  | AF1556                |
| ACE2                           | 1:200            | R&D Systems                  | AF3437                |
| TFRC                           | 1:100            | Thermo Fischer Scientific    | 13-6800               |
| SLC16A1                        | 1:100            | Acris                        | TA321556              |
| ICAM1                          | 1:100            | Abcam                        | ab25375               |
| Cleaved-CASPASE3               | 1:100            | Cell Signalling Technologies | 9661                  |
| CSPG4                          | 1:100            | Sigma Aldrich                | AB5320                |
| APP                            | 1:100            | Thermo Scientific            | PA519923              |
| SPP1                           | 1:100            | R&D Systems                  | AF808                 |
| IBA1                           | 1:100            | WAKO Nordic Biolabs          | 019-19741             |
| MCAM                           | 1:100            | Abcam                        | ab75769               |
